# Supplementary material for: Intratumoral genetic heterogeneity in metastatic melanoma is accompanied by variation in malignant behaviors
Source: PubMed Central journal article supplement (PMC3852494; doi:10.1186/1755-8794-6-40), 2013-10-11

Amplification ■ Deletion ■

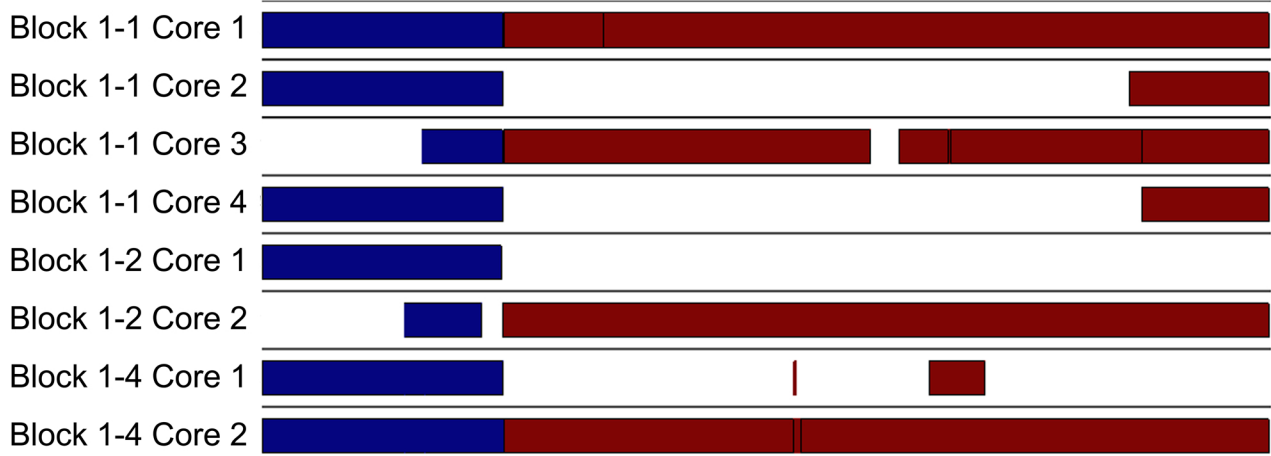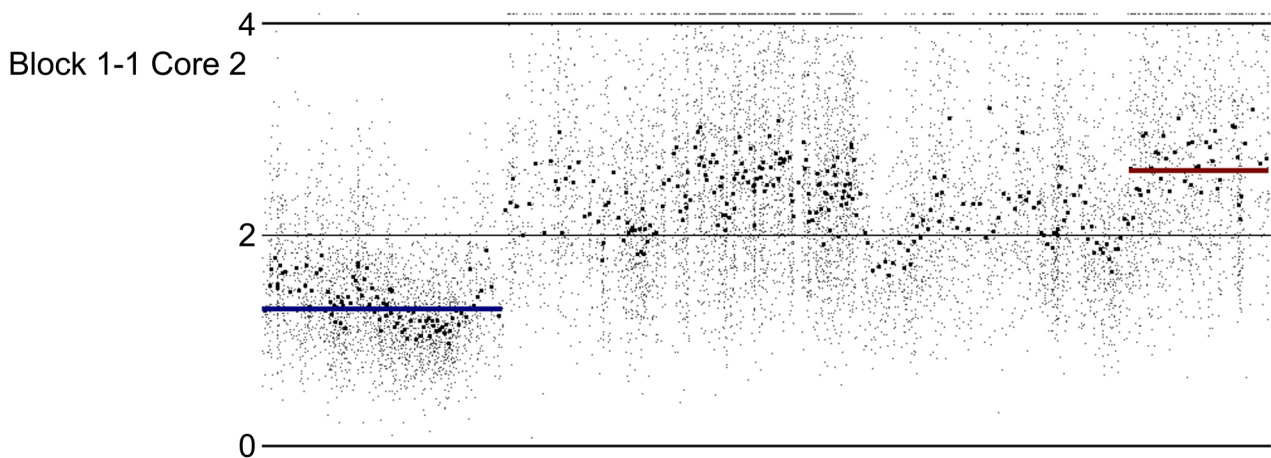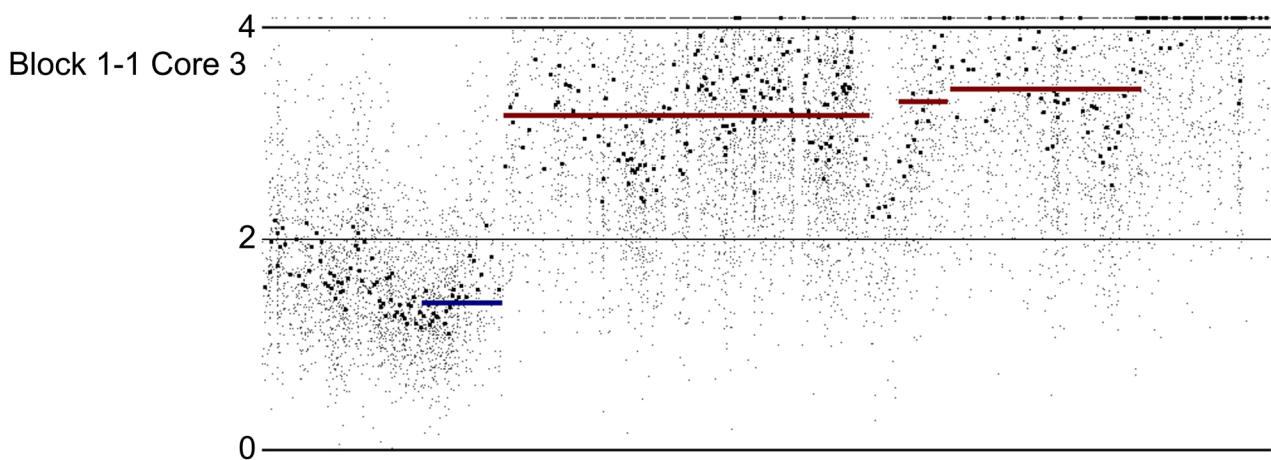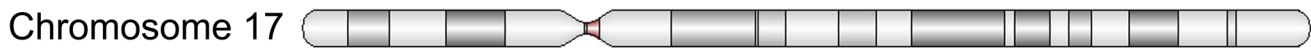

Supplement: 1755-8794-6-40-S2.pdf [file 1755-8794-6-40-S2.pdf]
