# Supplementary material for: Intratumoral genetic heterogeneity in metastatic melanoma is accompanied by variation in malignant behaviors
Source: PubMed Central journal article supplement (PMC3852494; doi:10.1186/1755-8794-6-40), 2013-10-11
Supplement: 1755-8794-6-40-S6.pdf [file 1755-8794-6-40-S6.pdf]

Tumor 2

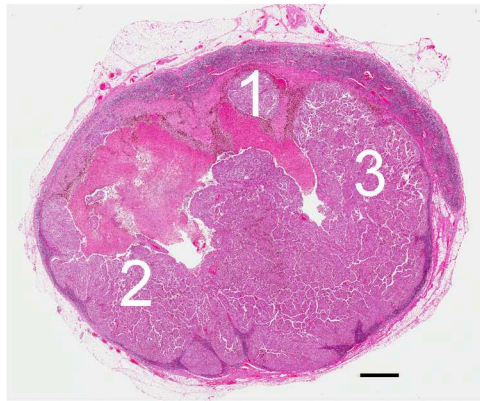

Tumor 3

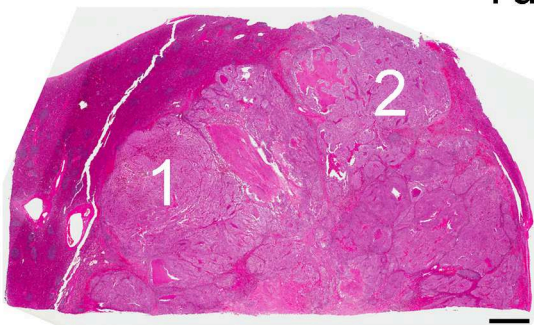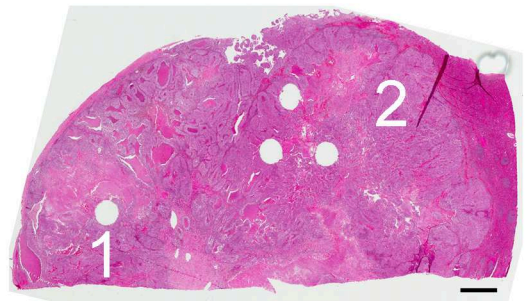

Block 1-1

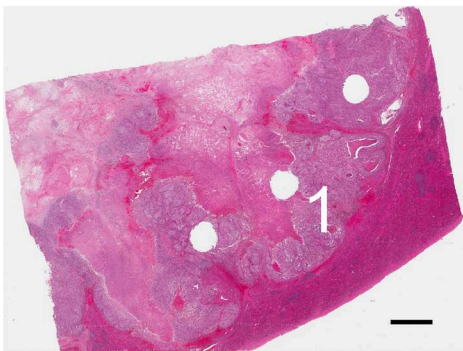

Block 1-2

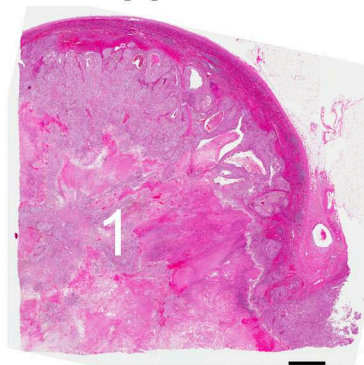

Block 1-3

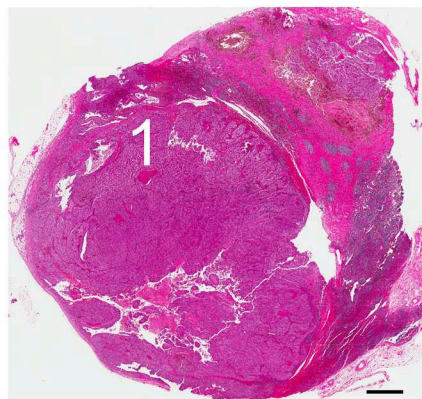

Block 1-4

Block 2-4
